# Supplementary material
Source: Royal Society of Chemistry journal article supplement (doi:10.1039/d6an00218h)
Supplement: d6an00218h1.pdf [file d6an00218h1.pdf]

## SUPPLEMENTARY INFORMATION

# **AuNPs/rGO-Enhanced Molecularly Imprinted Field-Effect Transistor Sensor for Highly Selective Detection of Lactic Acid in Sweat**

Yi Xiong<sup>a</sup>, Hong Zhu<sup>a</sup>, Lei Wang<sup>a</sup>, Runan Tan<sup>a</sup>, Ting Wang<sup>a</sup>, Ping Wang<sup>c\*</sup>, Hanping He<sup>b\*</sup>, Gang Chang<sup>a\*</sup>

<sup>a</sup> Ministry of Education Key Laboratory for the Green Preparation and Application of Functional Materials, Hubei Key Laboratory of Polymer Materials, School of Materials Science and Engineering, Hubei University, Wuhan 430062, China

<sup>b</sup> College of Health Science and Engineering, Hubei University, Wuhan 430062, China

<sup>c</sup> Department of Clinical Laboratory, Union Hospital, Tongji Medical College, Huazhong University of Science and Technology, Wuhan 430022, China

Corresponding author e-mail: [2000xh0689@hust.edu.cn](mailto:2000xh0689@hust.edu.cn); [hehanping@hubu.edu.cn](mailto:hehanping@hubu.edu.cn); [changgang@hubu.edu.cn](mailto:changgang@hubu.edu.cn)

## Contents

- S1. FE-SEM image of interdigitated finger electrodes with Al<sub>2</sub>O<sub>3</sub> ceramic substrate.**
- S2 SEM image of AuNPs electrodeposited on the rGO surface at -0.40 V with a deposition time exceeding 70 s.**
- S3. (A) CV and (B) Nyquist plots of NIP/AuNPs/rGO-GCE. (C) Selectivity comparison between MIP/AuNPs/rGO-GCE and NIP/AuNPs/rGO-GCE sensors toward LA and various interferents. (D) Nyquist plots of MIP/AuNPs/rGO-GCE before template elution, after template elution, and after LA rebinding in 5 mM [Fe(CN)<sub>6</sub>]<sup>3-/4-</sup> solution. Solid lines represent fits to the equivalent circuit model. Fitted parameters with 95% confidence intervals are summarized in the tables below.**
- S4. Transfer curves of MIP/AuNPs/rGO-FET in the presence of 20 μM LA at o-PD to LA molar ratios of (A) 2.5:1, (B) 5:1, (C) 10:1, (D) 20:1, and (E) 40:1.**
- S5. Transfer curves of (A) AuNPs/rGO-FET, (B) MIP/rGO-FET, and (C) MIP/AuNPs/rGO-FET upon exposure to 100 μM LA after template elution. (D) Comparison of voltage response values ( $\Delta V$ ) for different device configurations to 100 μM LA.**
- S6. Selectivity of the MIP/AuNPs/rGO-FET sensor for LA in the presence of 10 mM common sweat interferents.**
- S7. Comparison of performance between multiple batches of MIP/AuNPs/rGO-FET sensors.**
- T1. Statistical analysis of performance metrics for ten independent MIP/AuNPs/rGO-FET sensors**
- T2. Comparison of analytical performance of MIP/AuNPs/rGO-FET with previously**

reported LA sensors.

**T3. Real Sample Analysis.**

**T4. Comparison of the proposed sensor with a commercial lactate assay kit for LA detection in sweat samples.**

**Figure. S1**

FE-SEM image of interdigitated finger electrodes with  $\text{Al}_2\text{O}_3$  ceramic substrate.

**Figure. S2**

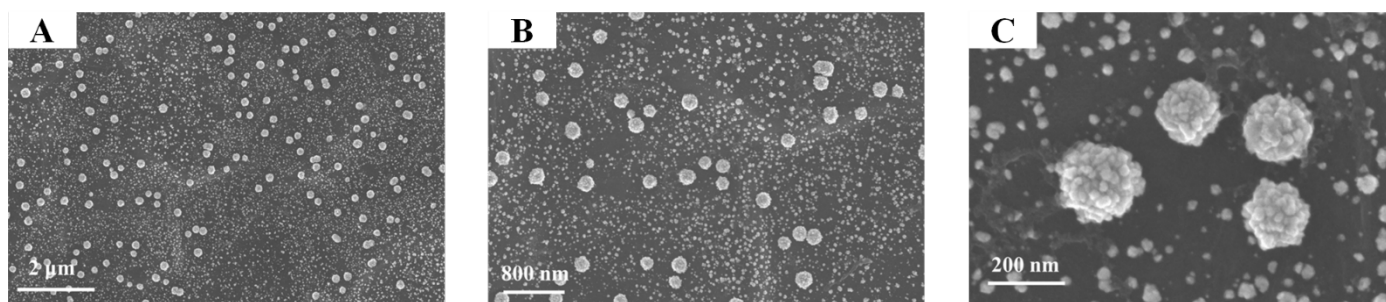

SEM image of AuNPs electrodeposited on the rGO surface at - 0.40 V with a deposition time exceeding 70 s.

**Figure. S3**

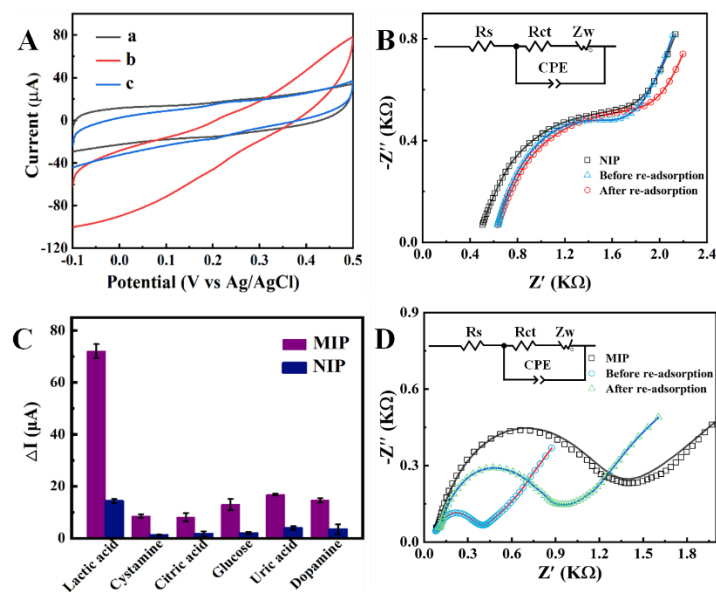

(A) CV and (B) Nyquist plots of NIP/AuNPs/rGO-GCE. (C) Selectivity comparison between MIP/AuNPs/rGO-GCE and NIP/AuNPs/rGO-GCE sensors toward LA and various interferents. (D) Nyquist plots of MIP/AuNPs/rGO-GCE before template elution, after template elution, and after LA rebinding in 5 mM  $[\text{Fe}(\text{CN})_6]^{3-/4-}$  solution. Solid lines represent fits to the equivalent circuit model. Fitted parameters with 95% confidence intervals are summarized in the tables below.

Table (B): Fitted EIS parameters for NIP/AuNPs/rGO-GCE before template elution, after template elution, and after LA rebinding in 5 mM  $[\text{Fe}(\text{CN})_6]^{3-/4-}$  solution.

| contents          | $R_s$ ( $\Omega$ ) | $R_{ct}$ ( $\Omega$ ) | CPE-P ( $n$ ) | CPE-T ( $Y_0$ )                               | $W_R$      | $W_P$      | $\chi^2$              |
|-------------------|--------------------|-----------------------|---------------|-----------------------------------------------|------------|------------|-----------------------|
| NIP               | 579.5±2.58         | 1671±36.98            | 0.63±0.006    | $1.18 \times 10^{-5} \pm 5.75 \times 10^{-7}$ | 2678±26.12 | 0.66±0.020 | $1.26 \times 10^{-4}$ |
| Before adsorption | 452.6±6.93         | 1554±724.16           | 0.64±0.040    | $1.12 \times 10^{-5} \pm 4.33 \times 10^{-6}$ | 336±18.03  | 0.35±0.009 | $2.69 \times 10^{-4}$ |
| After adsorption  | 582.5±6.25         | 1563±76.03            | 0.64±0.016    | $1.60 \times 10^{-5} \pm 1.88 \times 10^{-6}$ | 4635±45.55 | 0.79±0.054 | $1.60 \times 10^{-3}$ |

Table (D): Fitted EIS parameters for MIP/AuNPs/rGO-GCE before template elution, after template elution, and after LA rebinding in 5 mM  $[\text{Fe}(\text{CN})_6]^{3-/4-}$  solution.

| contents          | $R_s$ ( $\Omega$ ) | $R_{ct}$ ( $\Omega$ ) | CPE-P ( $n$ ) | CPE-T ( $Y_0$ )                               | $W_R$       | $W_P$      | $\chi^2$              |
|-------------------|--------------------|-----------------------|---------------|-----------------------------------------------|-------------|------------|-----------------------|
| MIP               | 72.02±1.56         | 1092±40.18            | 0.80±0.007    | $4.60 \times 10^{-6} \pm 2.95 \times 10^{-7}$ | 5215±81.94  | 0.32±0.024 | $1.89 \times 10^{-3}$ |
| Before adsorption | 56.4±2.32          | 319.2±13.49           | 0.73±0.018    | $9.04 \times 10^{-6} \pm 1.40 \times 10^{-6}$ | 2153±111.8  | 0.41±0.019 | $3.18 \times 10^{-4}$ |
| After adsorption  | 84.09±1.91         | 768.5±20.04           | 0.79±0.010    | $5.71 \times 10^{-6} \pm 4.65 \times 10^{-7}$ | 3447±302.03 | 0.38±0.023 | $2.40 \times 10^{-3}$ |

Note: All values are mean ± 95% confidence intervals (standard error × 1.96).

Figure. S4

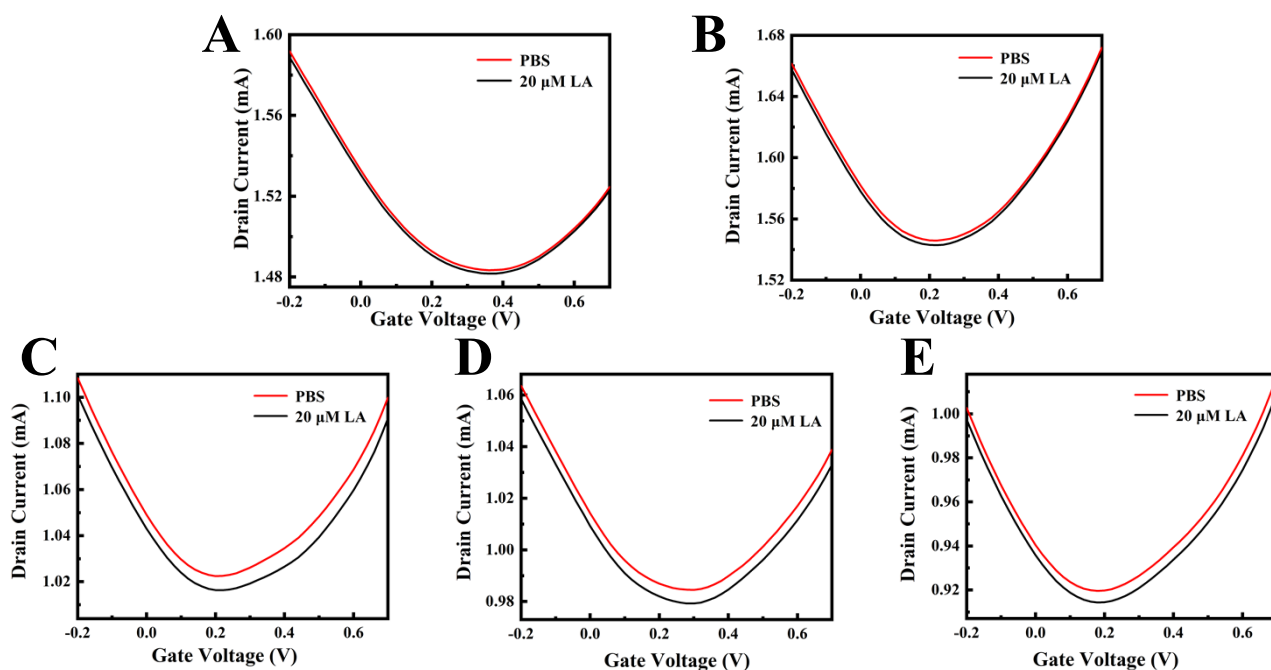

Transfer curves of MIP/AuNPs/rGO-FET in the presence of 20  $\mu\text{M}$  LA at o-PD to LA molar ratios of (A) 2.5:1, (B) 5:1, (C) 10:1, (D) 20:1, and (E) 40:1.

Figure. S5

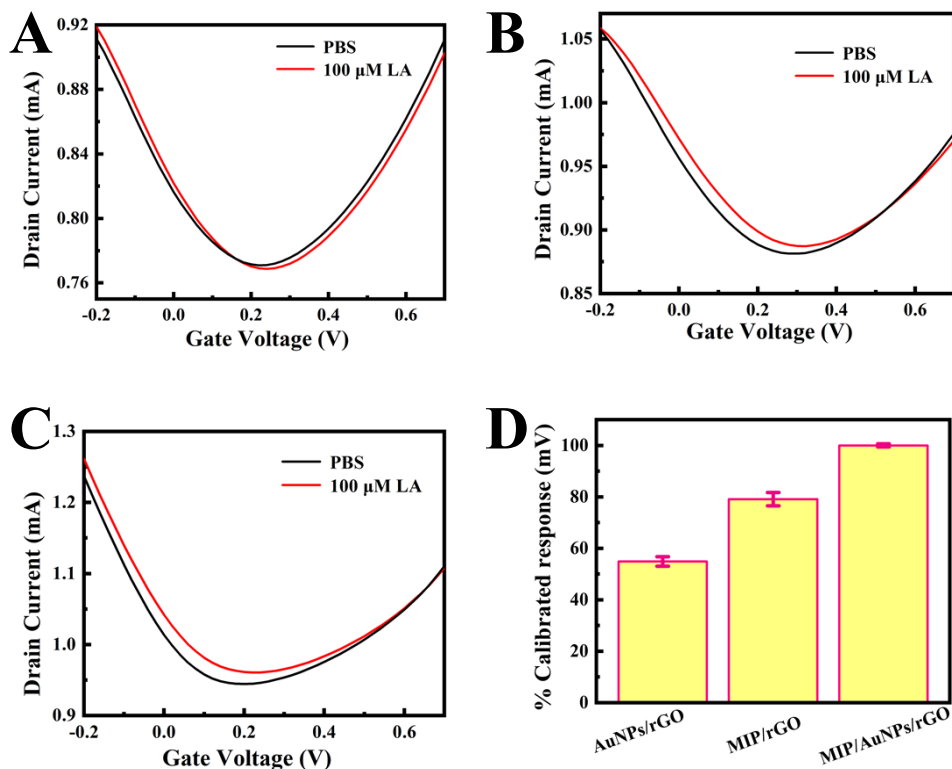

Transfer curves of (A) AuNPs/rGO-FET, (B) MIP/rGO-FET, and (C) MIP/AuNPs/rGO-FET upon exposure to 100  $\mu\text{M}$  LA after template elution. (D) Comparison of voltage response values ( $\Delta V$ ) for different device configurations to 100  $\mu\text{M}$  LA.

**Figure. S6**

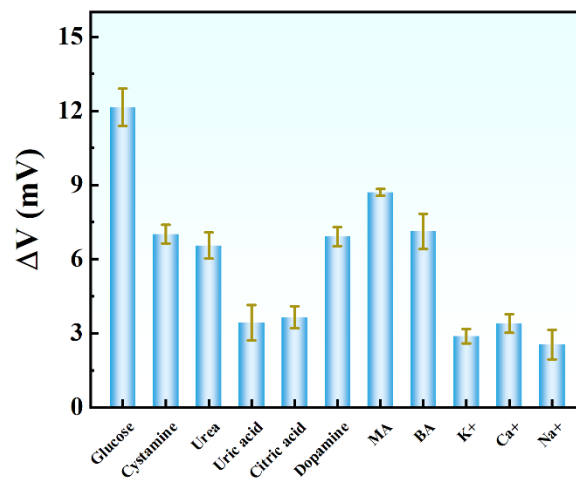

Selectivity of the MIP/AuNPs/rGO-FET sensor for LA in the presence of 10 mM common sweat interferents.

**Figure. S7**

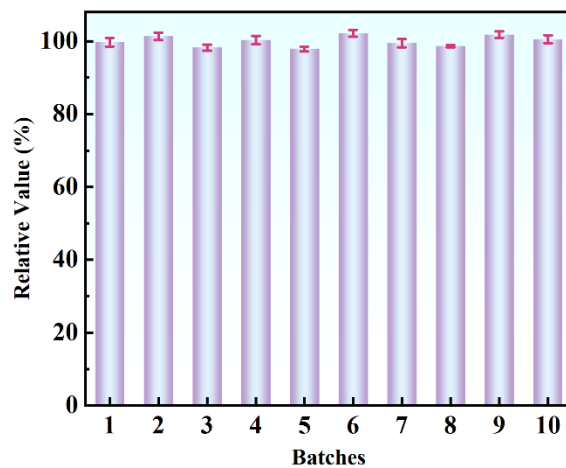

Comparison of performance between multiple batches of MIP/AuNPs/rGO-FET sensors.

**Table. S1** Statistical analysis of performance metrics for ten independent MIP/AuNPs/rGO-FET sensors.

| Sample (No.) | $V_{\text{Dirac}}$ (V) | $g_m$ (mS) | $I_{\text{ds}}$ (mA) | $\mu$ ( $\text{cm}^2 / (\text{V}\cdot\text{s})$ ) |
|--------------|------------------------|------------|----------------------|---------------------------------------------------|
| 1            | 0.18                   | 1.013      | 1.2319               | 6.26                                              |
| 2            | 0.18                   | 0.9897     | 1.2363               | 6.12                                              |
| 3            | 0.18                   | 0.9777     | 1.2380               | 6.05                                              |
| 4            | 0.18                   | 0.9502     | 1.2383               | 5.88                                              |
| 5            | 0.16                   | 0.9619     | 1.2342               | 5.95                                              |
| 6            | 0.16                   | 0.9496     | 1.2358               | 5.87                                              |
| 7            | 0.16                   | 0.9411     | 1.2360               | 5.82                                              |
| 8            | 0.16                   | 0.9682     | 1.2354               | 5.99                                              |
| 9            | 0.16                   | 0.9496     | 1.2358               | 5.87                                              |
| 10           | 0.16                   | 0.9532     | 1.2367               | 5.90                                              |
| Mean value   | 0.168                  | 0.965      | 1.238                | 5.97                                              |
| RSD (%)      | 1.03                   | 2.2        | 0.42                 | 13.7                                              |

**Table. S2** Comparison of analytical performance of MIP/AuNPs/rGO-FET with previously reported LA sensors.

| Material                     | Method     | LOD          | Linear range          | Ref.         |
|------------------------------|------------|--------------|-----------------------|--------------|
| MIP/AuNPs/rGO-GCE            | CV         | 89.3 pM      | 0.1 nM-15 nM          | 1            |
| MIP                          | UV-Vis     | 0.162 mM     | 0.1 mM-1.7 mM         | 2            |
| MIP/AgNWs                    | DPV        | 0.22 $\mu$ M | 1 $\mu$ M-0.1 M       | 3            |
| MIP/rGO/AgNPs/AuE            | CV         | 0.72 $\mu$ M | 10 $\mu$ M-50 $\mu$ M | 4            |
| Nafion/ LOx                  | OECT       | 100 pM       | 100 pM-10 mM          | 5            |
| Nafion-<br>LOx/PPy/MWCNT/PA6 | OECT       | 1 nM         | 1 nM-1 mM             | 6            |
| LDH/Chit                     | NiO FET    | 0.2 aM       | 1 aM-1 pM             | 7            |
| AlGaAs/GaAs                  | ZnONWs FET | 30 pM        | 30 pM-300 mM          | 8            |
| LOx/BSA                      | OECT       | 11 nM        | 0.25 mM-5 mM          | 9            |
| Ni/Al LDH                    | OECT       | 40 $\mu$ M   | 100 mM-2.5 mM         | 10           |
| LOx/GA-CN/HRP-OsRP/Au        | EG-OFET    | 66 nM        | 60 nM-220 nM          | 11           |
| LOx-HRP/OsRP                 | F-OFET     | -            | 0 - 10 mM             | 12           |
| PSS/MWCNTs/cotton fiber      | Fb-OECT    | 0.28 $\mu$ M | 1 $\mu$ M -20 mM      | 13           |
| MIP/AuNPs/rGO-FET            | FET        | 3.33 pM      | 10 pM-1 mM            | This<br>work |

**Notes:** LOD: limit of detection; GCE: glassy carbon electrode; rGO: reduced graphene oxide; MIP: molecular imprinting layer; AuNPs: gold nanoparticle; AgNWs: silver nanowires; AgNPs: silver nanoparticles; AuE: gold electrode; LOx: lactate oxidase; PPy: polypyrrole; MWCNT: multi-walled carbon nanotubes; PA6: polyamide 6; Ni/Al LDH: Ni/Al layered double hydroxide; Chit: chitosan and BSA stands for bovine serum protein; OECT: Organic Electrochemical Transistor; EG-OFET: Extended-Gate Organic Field-Effect Transistor; F-OFET: Flexible Organic Field-Effect Transistor; HRP: Horseradish Peroxidase; OsRP: Osmium Redox Polymer; GA-CN: Glutaraldehyde Crosslinked Network; Fb-OECT: Fiber-based Organic Electrochemical Transistor; PSS: Poly(sodium 4-styrenesulfonate).

**Table. S3** Real Sample Analysis.

| Sample                 | Added      | Detection      | Recovery (%) | RSD (%) |
|------------------------|------------|----------------|--------------|---------|
| Diluted Lactate sample | 1 nM       | 1.085 nM       | 108.47       | 11.06   |
|                        | 100 nM     | 98.36 nM       | 98.36        | 9.88    |
|                        | 10 $\mu$ M | 9.886 $\mu$ M  | 98.86        | 5.82    |
| Sweat                  | 1 nM       | 1.049 nM       | 104.93       | 11.30   |
|                        | 100 nM     | 101.93 nM      | 101.93       | 10.45   |
|                        | 10 $\mu$ M | 10.259 $\mu$ M | 102.59       | 7.40    |

**Table. S4** Comparison of the proposed sensor with a commercial lactate assay kit for LA detection in sweat samples.

| Sample | Number | Lactate Assay Kit | FET Detection | RD (%) | RSD (%) |
|--------|--------|-------------------|---------------|--------|---------|
|        |        | ( $\mu$ M)        | ( $\mu$ M)    |        |         |
| Sweat  | 1      | 175               | 181           | 96.7%  | 1.34    |
|        | 2      | 556               | 548           | 101.5% | 2.89    |
|        | 3      | 953               | 946           | 100.7% | 1.66    |

## References

1. T. C. Pereira and N. R. Stradiotto, *Microchimica Acta*, 2019, 186, 764.
2. Y. L. Mustafa and H. S. Leese, *ACS Omega*, 2023, 8, 8732-8742.
3. Q. Zhang, D. Jiang, C. Xu, Y. Ge, X. Liu, Q. Wei, L. Huang, X. Ren, C. Wang and Y. Wang, *Sensors and Actuators B: Chemical*, 2020, 320, 128325.
4. F. Ben Moussa, F. Achi, H. Meskher, A. Henni and H. Belkhalifa, *Materials Chemistry and Physics*, 2022, 289, 126456.
5. Y. Tao, R. Zhu, P. Hao, W. Jiang, M. Li, Q. Liu, L. Yang, Y. Wang and D. Wang, *Materials Science and Engineering: B*, 2023, 290, 116356.
6. Y. Zhang, Y. Wang, X. Qing, Y. Wang, W. Zhong, W. Wang, Y. Chen, Q. Liu, M. Li and D. Wang, *Analytical and Bioanalytical Chemistry*, 2020, 412, 7515-7524.
7. S. Mansouri Majd, A. Salimi and B. Astinchap, *Biosensors and Bioelectronics*, 2017, 92, 733-740.
8. S. Ma, Q. Liao, H. Liu, Y. Song, P. Li, Y. Huang and Y. Zhang, *Nanoscale*, 2012, 4, 6415-6418.
9. L. J. Currano, F. C. Sage, M. Hagedon, L. Hamilton, J. Patrone and K. Gerasopoulos, *Scientific Reports*, 2018, 8, 15890.
10. I. Gualandi, M. Tessarolo, F. Mariani, D. Arcangeli, L. Possanzini, D. Tonelli, B. Fraboni and E. Scavetta, *Sensors*, 2020, 20, 3453.
11. T. Minami, T. Sato, T. Minamiki, K. Fukuda, D. Kumaki and S. Tokito, *Biosensors and Bioelectronics*, 2015, 74, 45-48.
12. T. Minamiki, S. Tokito and T. Minami, *Anal Sci*, 2019, 35, 103-106.
13. J. Li, Y. Fu, D. Luo, P. Li, H. Sun, T. Wang, G. Wang, L. Chen, L. Liu and H. Liu, *Microchemical Journal*, 2025, 219, 116170.
